# Supplementary material for: The role of c-FLIP splice variants in urothelial tumours
Source: PubMed Central journal article supplement — Cell Death Dis. 2011 Dec 22;2(12):e245–. doi: 10.1038/cddis.2011.131 (PMC3252741; doi:10.1038/cddis.2011.131), 2011-12-22
Supplement: cddis2011131x1.pdf [file cddis2011131x1.pdf]

# Supplementary figure 1

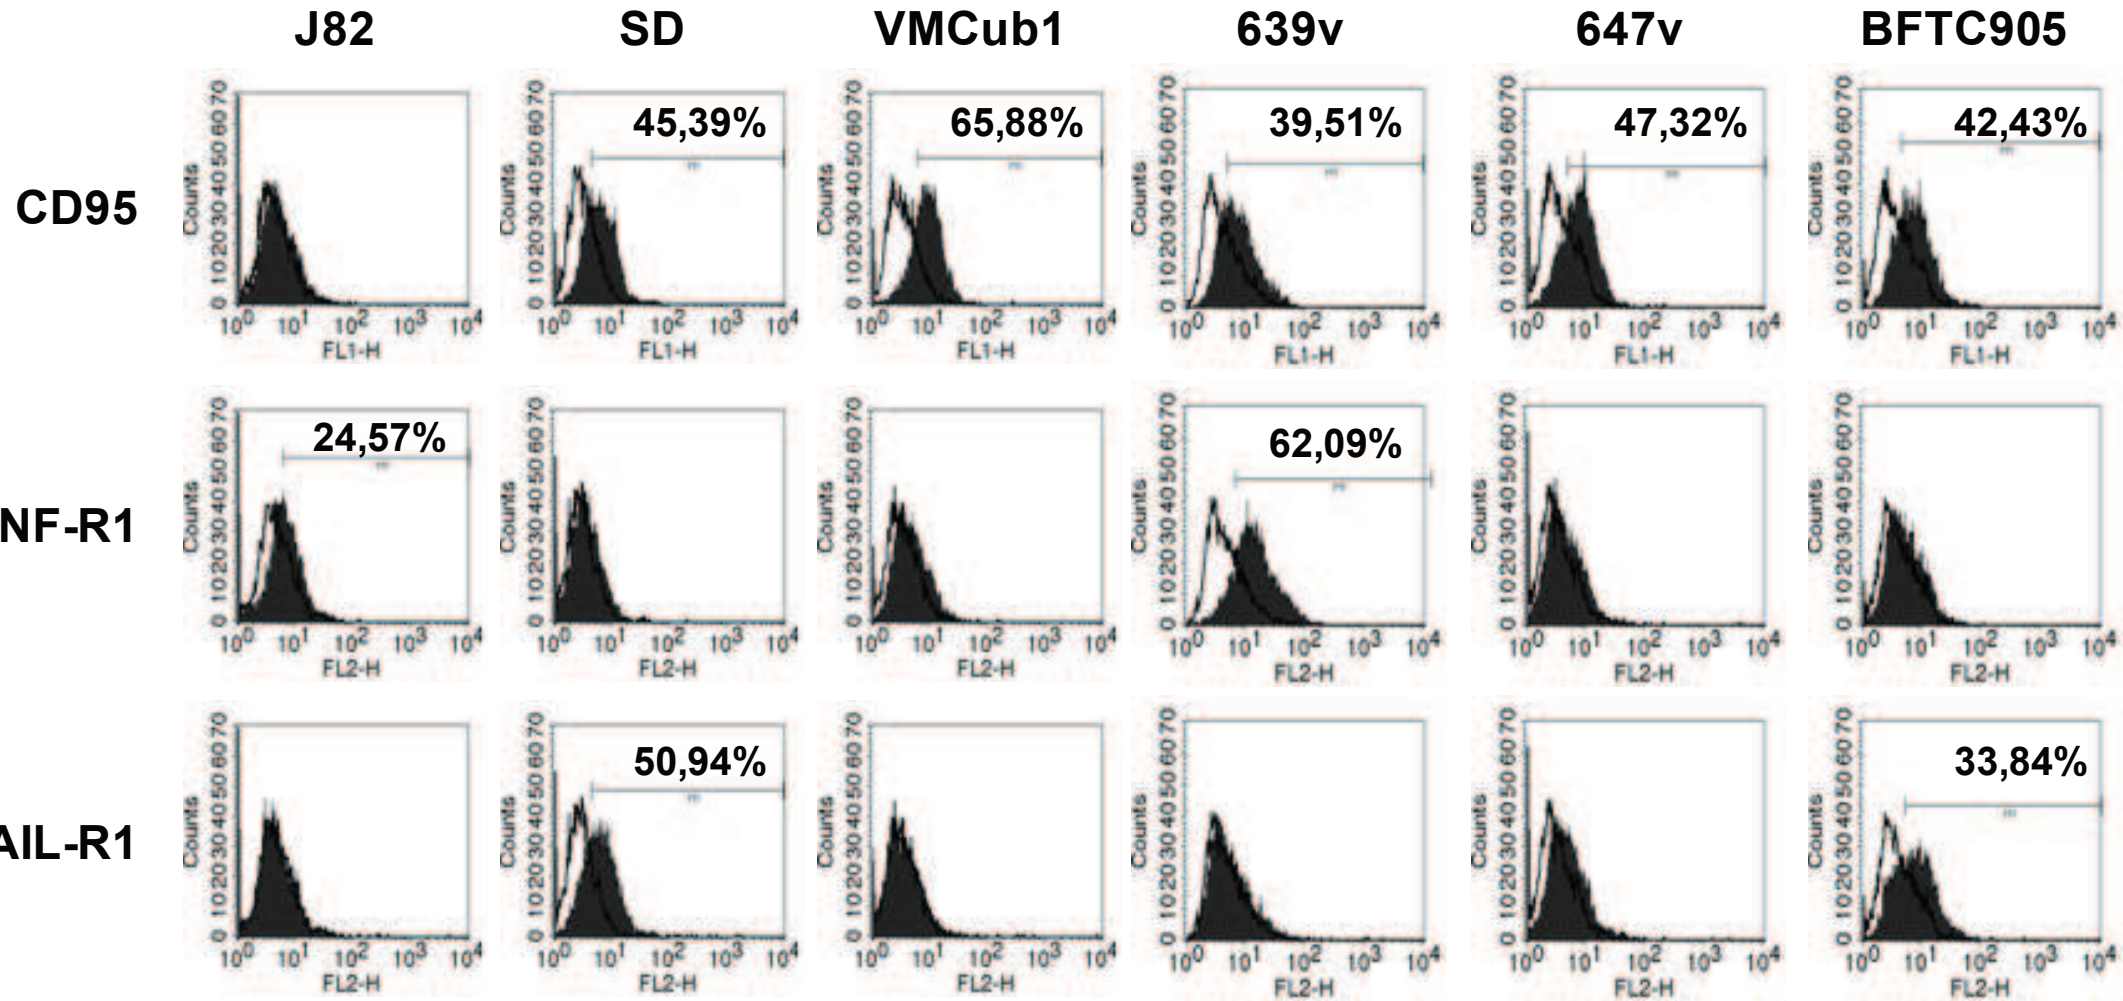

## Supplementary figure 2

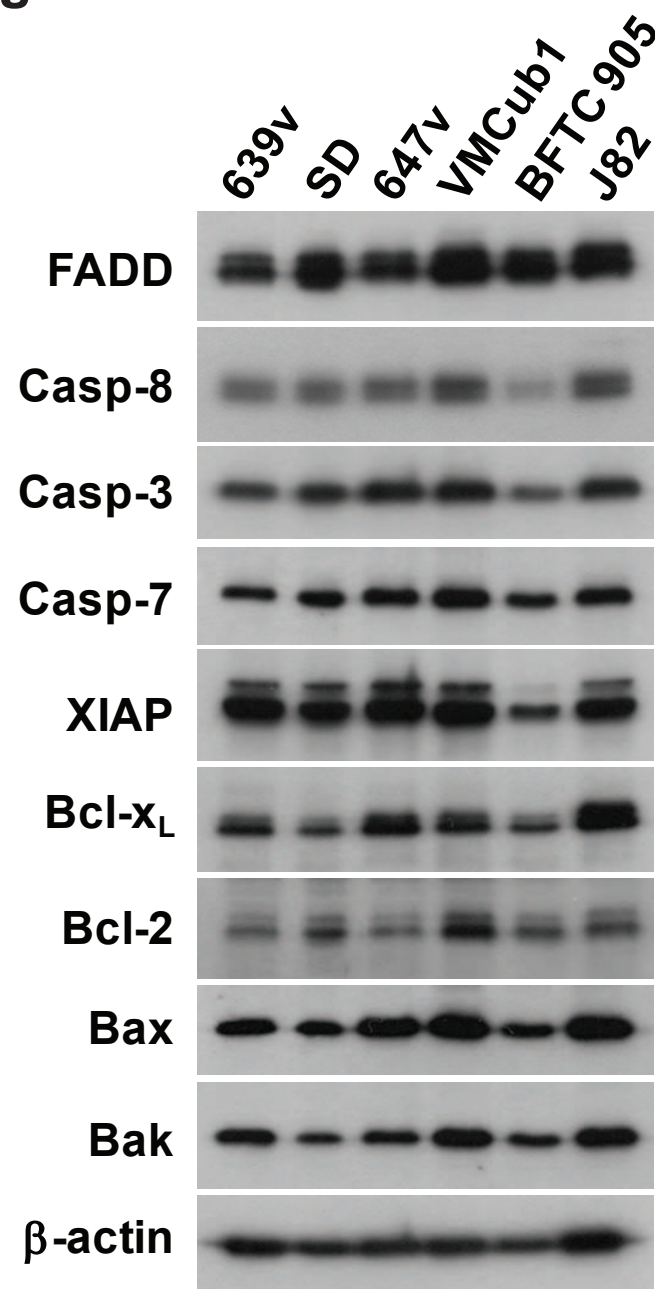

### Supplementary figure 3

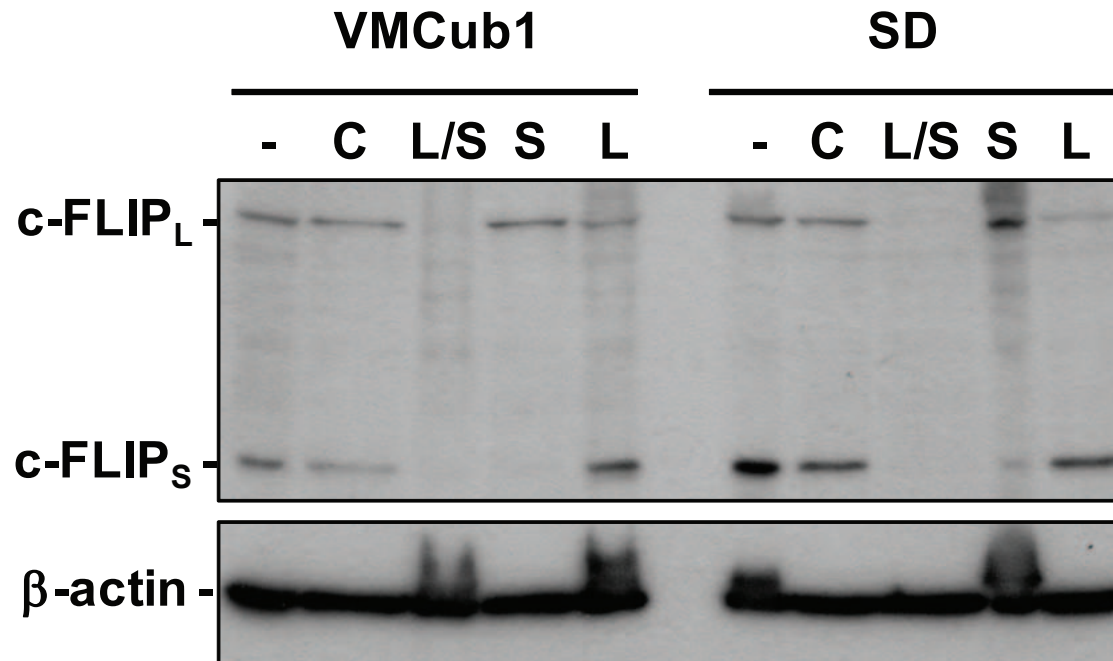

|     |                                       |
|-----|---------------------------------------|
| -   | no siRNA                              |
| C   | control siRNA (scramble)              |
| L/S | siRNA targeting c-FLIP <sub>L/S</sub> |
| S   | siRNA targeting c-FLIP <sub>S</sub>   |
| L   | siRNA targeting c-FLIP <sub>L</sub>   |
